# Supplementary material for: L-Methionine Protects against Oxidative Stress and Mitochondrial Dysfunction in an In Vitro Model of Parkinson’s Disease
Source: MDPI journal article supplement (doi:10.3390/antiox10091467), 2021-09-15
Supplement: s1 [file s1]

## Supplementary Materials

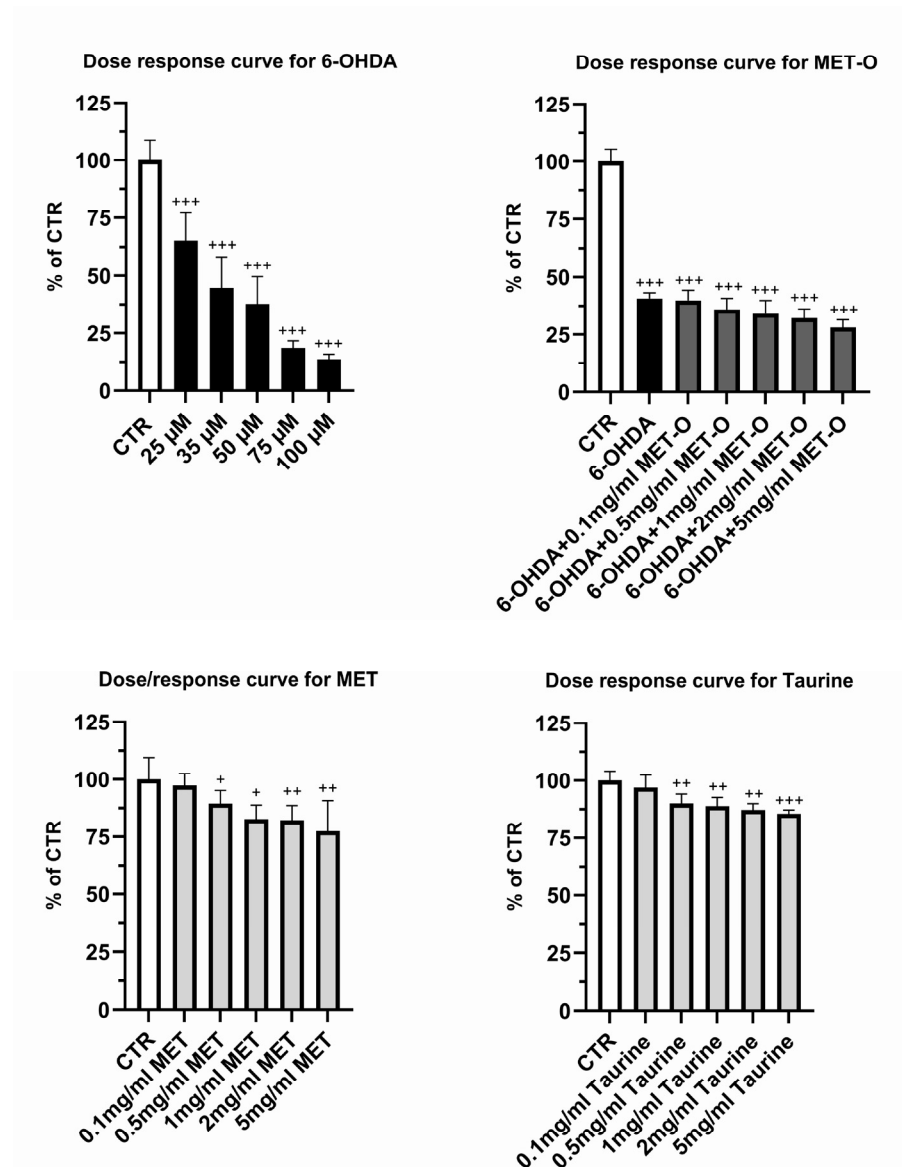

**Figure S1.** Dose response curve for Met, Met-O, taurine and 6-OHDA. Data are mean  $\pm$  SD of 3 different experiments. Data are expressed as % of CTR. +++  $p < 0.0001$ ; ++  $p < 0.005$ ; +  $p < 0.05$  vs. CTR.

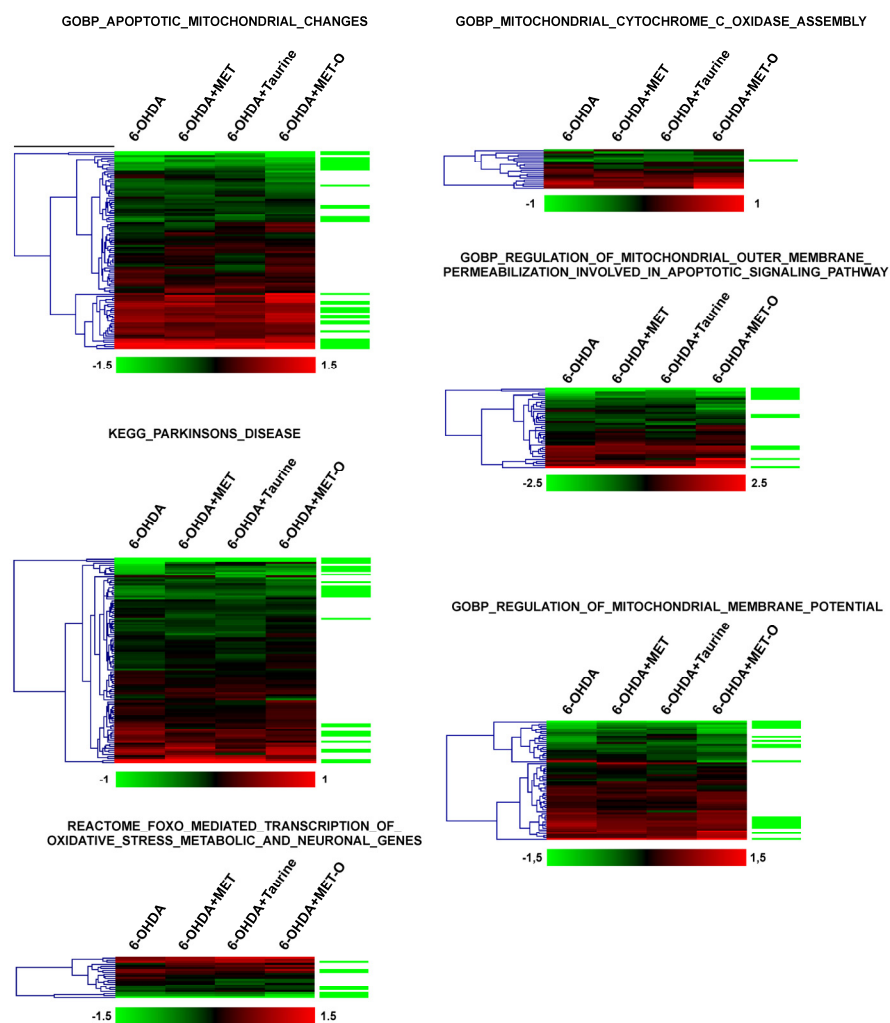

**Figure S2.** Heatmap of hierarchical clustering of the selected pathways. Color scale represents log<sub>2</sub> ratios of the expression levels in the indicated condition versus control. Color scale limits are indicated in the boxes below the respective heatmap.

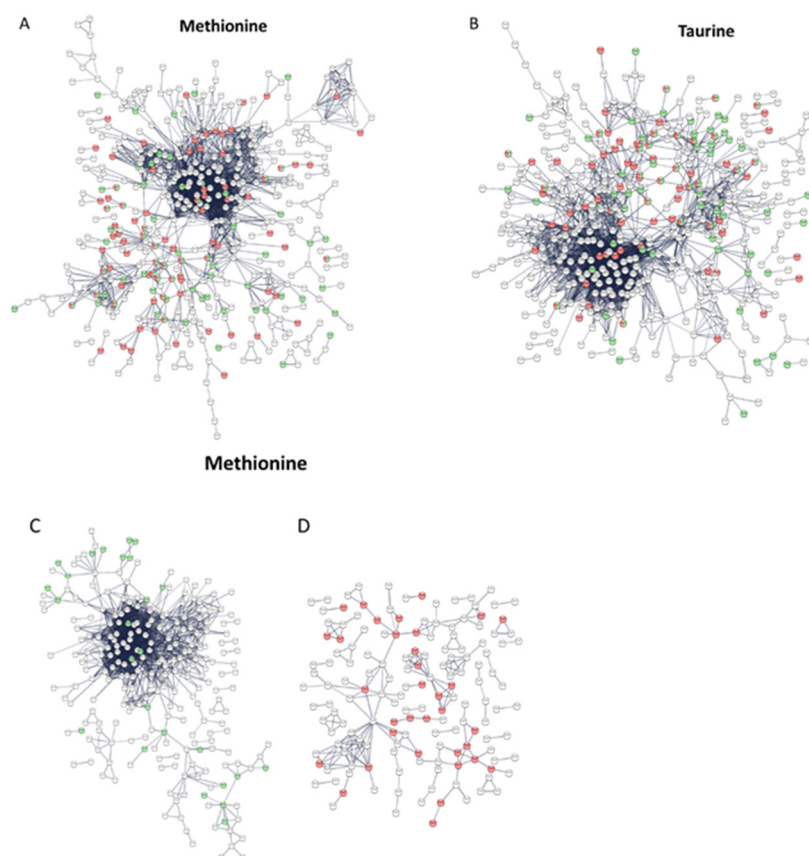

**Figure S3.** String protein network analysis. Upper panels. The analysis reveals that Methionine (A) and taurine (B) can modulate the expression of targets involved in apoptosis and cell death processes (red) and neurogenesis (green). Lower panels. Protein interactions associated with neurogenesis (green) and apoptosis/cell death (red) are mainly among the genes respectively down- (C) or up- (D) regulated by 6-OHDA and recovered by Methionine.

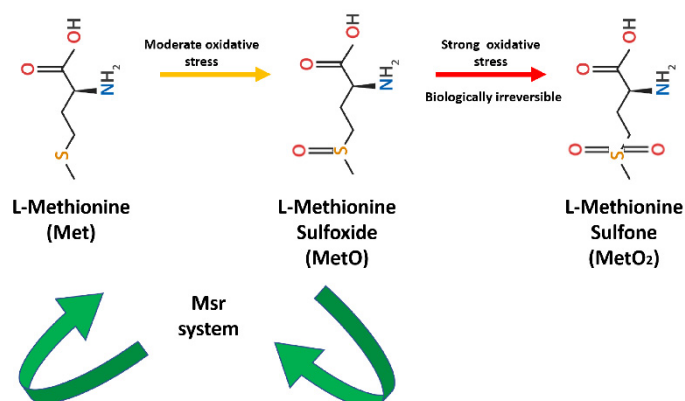

**Figure S4.** Schematic figure representative of the Msr system which reduce methionine sulfoxide to methionine repairing its antioxidant activity.

**Table S1.** Significance data relative to TMRM analyses (**Figure 9**) at different time points.

| vs CTR               |        |                    |     |      |         | vs 6-OHDA               |          |                      |     |      |         |
|----------------------|--------|--------------------|-----|------|---------|-------------------------|----------|----------------------|-----|------|---------|
| <b>0</b>             |        |                    |     |      |         | <b>0</b>                |          |                      |     |      |         |
| CTR vs. 6-OHDA       | 0      | -0,1794 to 0,1794  | No  | ns   | >0,9999 | 6-OHDA vs. CTR          | 0        | -0,1794 to 0,1794    | No  | ns   | >0,9999 |
| CTR vs. 6-OHDA+MET   | 0      | -0,1794 to 0,1794  | No  | ns   | >0,9999 | 6-OHDA vs. 6-OHDA+MET   | 0        | -0,1794 to 0,1794    | No  | ns   | >0,9999 |
| CTR vs. 6-OHDA+MET-O | 0      | -0,1794 to 0,1794  | No  | ns   | >0,9999 | 6-OHDA vs. 6-OHDA+MET-O | 0        | -0,1794 to 0,1794    | No  | ns   | >0,9999 |
| CTR vs. 6-OHDA+TAU   | 0      | -0,1794 to 0,1794  | No  | ns   | >0,9999 | 6-OHDA vs. 6-OHDA+TAU   | 0        | -0,1794 to 0,1794    | No  | ns   | >0,9999 |
| <b>4</b>             |        |                    |     |      |         | <b>4</b>                |          |                      |     |      |         |
| CTR vs. 6-OHDA       | 0,6259 | 0,4465 to 0,8052   | Yes | **** | <0,0001 | 6-OHDA vs. CTR          | -0,6259  | -0,8052 to -0,4465   | Yes | **** | <0,0001 |
| CTR vs. 6-OHDA+MET   | 0,2125 | 0,03315 to 0,3919  | Yes | *    | 0,0151  | 6-OHDA vs. 6-OHDA+MET   | -0,4133  | -0,5927 to -0,2340   | Yes | **** | <0,0001 |
| CTR vs. 6-OHDA+MET-O | 0,4413 | 0,2619 to 0,6207   | Yes | **** | <0,0001 | 6-OHDA vs. 6-OHDA+MET-O | -0,1845  | -0,3639 to -0,005153 | Yes | *    | 0,042   |
| CTR vs. 6-OHDA+TAU   | 0,1374 | -0,04197 to 0,3168 | No  | ns   | 0,1799  | 6-OHDA vs. 6-OHDA+TAU   | -0,4885  | -0,6678 to -0,3091   | Yes | **** | <0,0001 |
| <b>8</b>             |        |                    |     |      |         | <b>8</b>                |          |                      |     |      |         |
| CTR vs. 6-OHDA       | 0,7037 | 0,5244 to 0,8831   | Yes | **** | <0,0001 | 6-OHDA vs. CTR          | -0,7037  | -0,8831 to -0,5244   | Yes | **** | <0,0001 |
| CTR vs. 6-OHDA+MET   | 0,2207 | 0,04131 to 0,4001  | Yes | *    | 0,0111  | 6-OHDA vs. 6-OHDA+MET   | -0,483   | -0,6624 to -0,3037   | Yes | **** | <0,0001 |
| CTR vs. 6-OHDA+MET-O | 0,5826 | 0,4033 to 0,7620   | Yes | **** | <0,0001 | 6-OHDA vs. 6-OHDA+MET-O | -0,1211  | -0,3005 to 0,05829   | No  | ns   | 0,2738  |
| CTR vs. 6-OHDA+TAU   | 0,2514 | 0,07200 to 0,4308  | Yes | **   | 0,0031  | 6-OHDA vs. 6-OHDA+TAU   | -0,4524  | -0,6317 to -0,2730   | Yes | **** | <0,0001 |
| <b>12</b>            |        |                    |     |      |         | <b>12</b>               |          |                      |     |      |         |
| CTR vs. 6-OHDA       | 0,8434 | 0,6640 to 1,023    | Yes | **** | <0,0001 | 6-OHDA vs. CTR          | -0,8434  | -1,023 to -0,6640    | Yes | **** | <0,0001 |
| CTR vs. 6-OHDA+MET   | 0,2387 | 0,05936 to 0,4181  | Yes | **   | 0,0053  | 6-OHDA vs. 6-OHDA+MET   | -0,6047  | -0,7841 to -0,4253   | Yes | **** | <0,0001 |
| CTR vs. 6-OHDA+MET-O | 0,787  | 0,6076 to 0,9664   | Yes | **** | <0,0001 | 6-OHDA vs. 6-OHDA+MET-O | -0,05644 | -0,2358 to 0,1229    | No  | ns   | 0,8458  |
| CTR vs. 6-OHDA+TAU   | 0,2731 | 0,09374 to 0,4525  | Yes | **   | 0,0012  | 6-OHDA vs. 6-OHDA+TAU   | -0,5703  | -0,7497 to -0,3909   | Yes | **** | <0,0001 |
| <b>16</b>            |        |                    |     |      |         | <b>16</b>               |          |                      |     |      |         |
| CTR vs. 6-OHDA       | 0,932  | 0,7527 to 1,111    | Yes | **** | <0,0001 | 6-OHDA vs. CTR          | -0,932   | -1,111 to -0,7527    | Yes | **** | <0,0001 |
| CTR vs. 6-OHDA+MET   | 0,3723 | 0,1930 to 0,5517   | Yes | **** | <0,0001 | 6-OHDA vs. 6-OHDA+MET   | -0,5597  | -0,7391 to -0,3803   | Yes | **** | <0,0001 |
| CTR vs. 6-OHDA+MET-O | 0,8869 | 0,7075 to 1,066    | Yes | **** | <0,0001 | 6-OHDA vs. 6-OHDA+MET-O | -0,04518 | -0,2246 to 0,1342    | No  | ns   | 0,9217  |
| CTR vs. 6-OHDA+TAU   | 0,463  | 0,2836 to 0,6424   | Yes | **** | <0,0001 | 6-OHDA vs. 6-OHDA+TAU   | -0,469   | -0,6484 to -0,2897   | Yes | **** | <0,0001 |
| <b>24</b>            |        |                    |     |      |         | <b>24</b>               |          |                      |     |      |         |
| CTR vs. 6-OHDA       | 1,006  | 0,8262 to 1,185    | Yes | **** | <0,0001 | 6-OHDA vs. CTR          | -1,006   | -1,185 to -0,8262    | Yes | **** | <0,0001 |
| CTR vs. 6-OHDA+MET   | 0,434  | 0,2546 to 0,6134   | Yes | **** | <0,0001 | 6-OHDA vs. 6-OHDA+MET   | -0,5716  | -0,7509 to -0,3922   | Yes | **** | <0,0001 |
| CTR vs. 6-OHDA+MET-O | 0,9713 | 0,7919 to 1,151    | Yes | **** | <0,0001 | 6-OHDA vs. 6-OHDA+MET-O | -0,03424 | -0,2136 to 0,1451    | No  | ns   | 0,9694  |
| CTR vs. 6-OHDA+TAU   | 0,5068 | 0,3274 to 0,6862   | Yes | **** | <0,0001 | 6-OHDA vs. 6-OHDA+TAU   | -0,4988  | -0,6781 to -0,3194   | Yes | **** | <0,0001 |

TAU=taurine.
